# Supplementary material
Source: PubMed Central journal article supplement (PMC4273560)

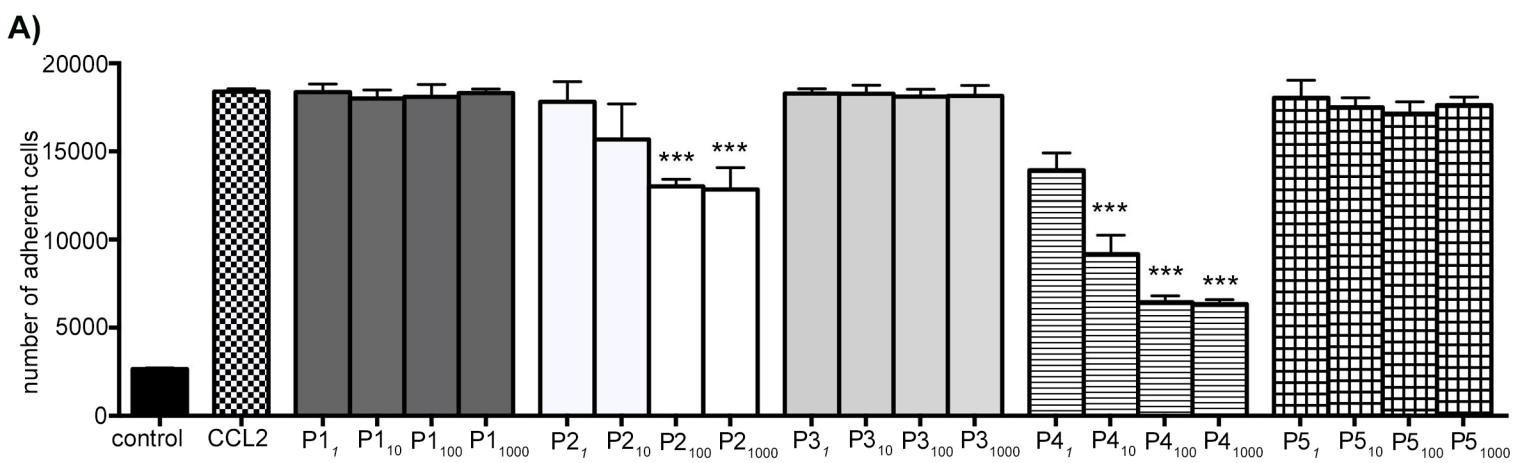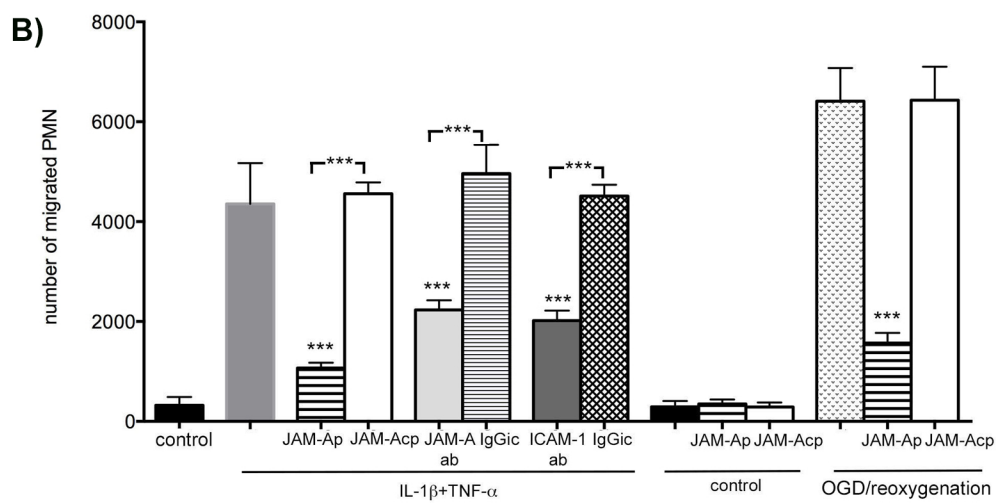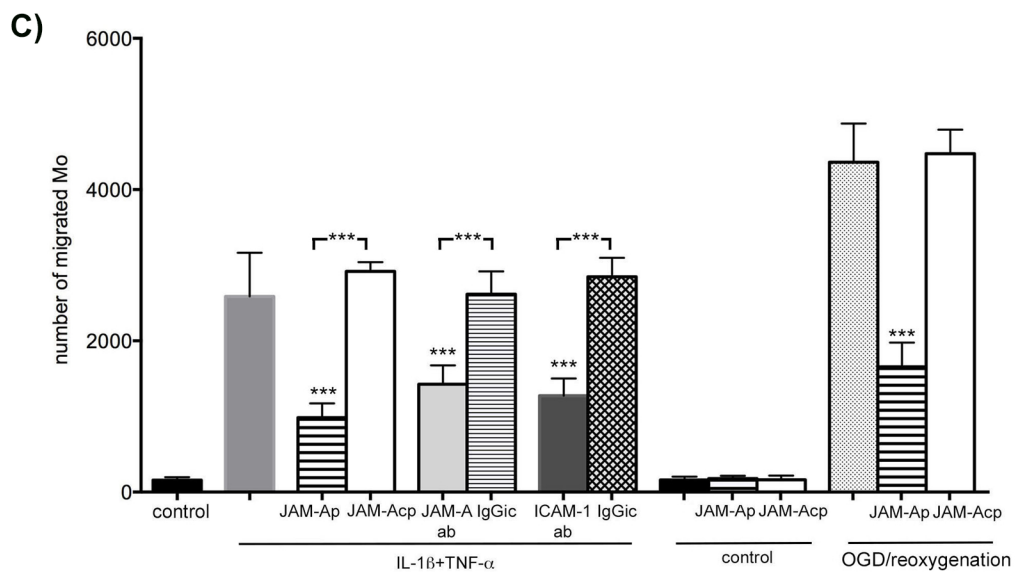

Supplemental Figure 1.

Supplement: NIHMS578841-supplement-1.pdf [file NIHMS578841-supplement-1.pdf]

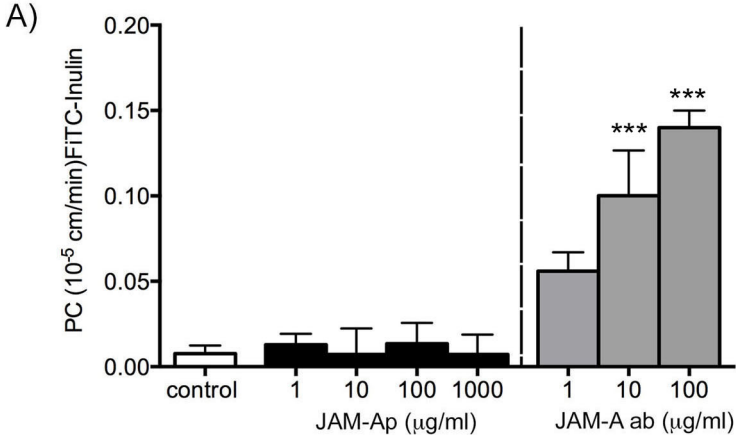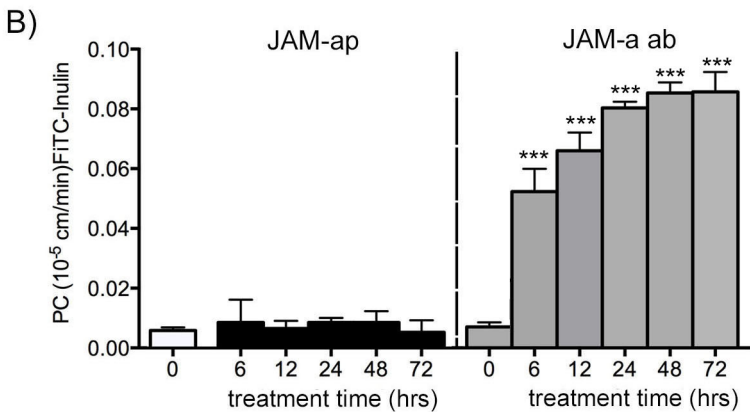

Supplemental Figure 2.

Supplement: NIHMS578841-supplement-2.pdf [file NIHMS578841-supplement-2.pdf]
